# Supplementary material for: Association of Optimism With Cardiovascular Events and All-Cause Mortality: A Systematic Review and Meta-analysis
Source: PubMed Central journal article supplement (PMC6777240; doi:10.1001/jamanetworkopen.2019.12200), 2019-09-27

## Supplementary Online Content

Rozanski A, Bavishi C, Kubzansky LD, Cohen R. Association of optimism with cardiovascular events and all-cause mortality: a systematic review and meta-analysis. *JAMA Netw Open*. 2019;2(9):e1912200. doi:10.1001/jamanetworkopen.2019.12200

**eTable 1.** Exposure and Outcomes Assessments and Adjusted Covariates in the Included Studies

**eTable 2.** Quality of Included Studies per Newcastle-Ottawa Scale for Quality Assessment of Cohort Studies

**eFigure.** Funnel Plots to Assess Publication Bias for (A) Cardiovascular Events and (B) All-Cause Mortality

This supplementary material has been provided by the authors to give readers additional information about their work.

**eTable 1.** Exposure and Outcomes Assessments and Adjusted Covariates in the Included Studies

| Study                 | Categories of Optimism                                                                                                            | Outcome assessment                                                            | Evidence of linear trend | Adjusted covariates                                                                                                                                                                                                                                                                                                          |
|-----------------------|-----------------------------------------------------------------------------------------------------------------------------------|-------------------------------------------------------------------------------|--------------------------|------------------------------------------------------------------------------------------------------------------------------------------------------------------------------------------------------------------------------------------------------------------------------------------------------------------------------|
| Anthony et al, 2016   | LOT-R score, continuous variable                                                                                                  | ICD 9 codes for all-cause and CV mortality                                    | Yes                      | Age, gender, angina meds, cholesterol-lowering meds, diabetic meds, SF-12 variables including mental component average week alcohol use, smoking status, waist-to-hip ratio, exercise status, score.                                                                                                                         |
| Boehm et al, 2011     | One question, three categories:<br>Cat 1 Low (reference)<br>Cat 2 Moderate<br>Cat 3 High                                          | National health registry and ICD 10 codes for CV mortality                    | No                       | Age, gender, systolic and diastolic blood pressure, high-density cholesterol, low-density cholesterol, triglycerides, body mass index, and diabetes;ethnicity, marital status, grade of employment, smoking status, psychological ill-being alcohol consumption, exercise, fruit and vegetable consumption.                  |
| Brummett et al, 2006  | MMPI derived scale, continuous variable                                                                                           | National death index, and social security death index for all-cause mortality | Yes                      | Gender.                                                                                                                                                                                                                                                                                                                      |
| Engberg et al, 2014   | One question, three categories:<br>Cat 1 Optimistic<br>Cat 2 Neutral (ref)<br>Cat 3 Pessimistic                                   | Danish Civil registration system for all-cause mortality                      | Yes                      | Circulatory diseases, cancer (except for skin cancer), diabetes, non-fatal chronic diseases, and lung disease, cognitive function, activities of daily living.                                                                                                                                                               |
| Giltay et al, 2004    | Subscale of Dutch Scale of Subjective Well-being:<br>Cat 1 0-8.6 (reference)<br>Cat 2 10-12.9<br>Cat 3 14.3-15.7<br>Cat 4 17.1-20 | Municipal registries and ICD 10 codes for all-cause and CV mortality          | Yes                      | Age, smoking (current, former, or never), alcohol education, socioeconomic status, marital status, and total activity score.                                                                                                                                                                                                 |
| Giltay et al, 2006    | 4 question scale:<br>Cat 1 0-1.25 (ref)<br>Cat 2 1.33-1.75<br>Cat 3 2.0                                                           | Municipal registries and ICD 9 codes for CV mortality                         | Yes                      | Age, smoking status, diabetes mellitus, mean arterial pressure, antihypertensive medication, total and high-density lipoprotein cholesterol levels, family history of stroke or myocardial infarction, living arrangement, education, self-rated health, body mass index, physical activity, alcohol use and smoking status. |
| Grossardt et al, 2009 | MMPI derived scale:<br>Cat 1 NR (reference)<br>Cat 2 NR<br>Cat 3NR<br>Cat 4 NR                                                    | National death index for all-cause mortality                                  | Yes                      | Education, self assessed general health, and alcohol use.                                                                                                                                                                                                                                                                    |
| Hansen et al, 2010    | Abbreviated LOT-R:                                                                                                                | ICD 9 and ICD 10 codes for                                                    | No                       | Age, gender, Framingham cardiovascular risk factors, negative and positive affect                                                                                                                                                                                                                                            |

|                            |                                                                                                                              |                                                                                                                  |     |                                                                                                                                                                                                                                                                                                                                                                                                                                |
|----------------------------|------------------------------------------------------------------------------------------------------------------------------|------------------------------------------------------------------------------------------------------------------|-----|--------------------------------------------------------------------------------------------------------------------------------------------------------------------------------------------------------------------------------------------------------------------------------------------------------------------------------------------------------------------------------------------------------------------------------|
|                            | Cat 1 High Optimism<br>Cat 2 Moderate<br>Cat 3 Low Optimism (reference)                                                      | ischemic heart disease                                                                                           |     |                                                                                                                                                                                                                                                                                                                                                                                                                                |
| Kim et al, 2011            | LOT-R optimism subscale, continuous variable                                                                                 | Self-report of physician's diagnosis or proxy reports for patients who had died                                  | Yes | Age, gender, chronic illness, self-reported health, race/ethnicity, marital status, educational degree, current smoker, exercise, alcohol use, diabetes, body mass index, systolic/diastolic blood pressure, hypertension, heart disease                                                                                                                                                                                       |
| Kim et al, 2016            | LOT-R score:<br>Cat 1 Median score 13 (reference)<br>Cat 2 Median score 19<br>Cat 3 Median score 22<br>Cat 4 Median score 24 | National death index, supplemented by reports from family members and postal authorities for all-cause mortality | Yes | Age, race, marital status, educational level, husband's educational level, father's occupation when the participant was 16 years of age, depression, high cholesterol, hypertension, type 2 diabetes mellitus, myocardial infarction, stroke, cancer, body mass index, smoking status, physical activity level, alcohol consumption, physical examination for screening purposes, and diet (Alternative Healthy Eating Index). |
| Kubzansky, et al 2001      | MMPI derived scale:<br>Cat 1 15 -41<br>Cat 2 41.1-49.9<br>Cat 3 50-79.7 (reference)                                          | Adjudication of hospital medical records, ICD 8 codes for Cardiac mortality                                      | Yes | Age, family history of CHD (yes or no), educational attainment, systolic and diastolic blood pressure (in mm Hg), serum total cholesterol level (mg/dl), anxiety, depression, anger. And alcohol intake ( $\geq 2$ drinks per day), BMI (kg/m <sup>2</sup> ), smoking status (never, former, or current).                                                                                                                      |
| Mosing et al, 2012         | LOT-R score, continuous variable                                                                                             | Australian National Death Index, ICD 10 codes for all-cause mortality                                            | Yes | Age, sex, socioeconomic status, smoking, drinking, obese, and exercise.                                                                                                                                                                                                                                                                                                                                                        |
| Nabi et al, 2010           | LOT-R score, quartiles of pessimism score                                                                                    | National Hospital Discharge Register and the Statistics Finland Mortality Register                               | Yes | Age, sex, education, marital status, behavior related risk factors, hypertension, diabetes, depression, general feeling of stressfulness, incident CHD                                                                                                                                                                                                                                                                         |
| Tindle et al, 2009         | LOT-R score:<br>Cat 1 $\geq 26$<br>Cat 2 24-25<br>Cat 3 22-23<br>Cat 4 $< 22$ (reference)                                    | National death index for all-cause and CV mortality                                                              | Yes | Age, race/ethnicity, education, income, observational study cohort vs clinical trial status, diabetes mellitus, hypertension, high cholesterol, HRT use, depressive symptoms, alcohol consumption, smoking, physical activity, and body mass index                                                                                                                                                                             |
| Weiss-Faratici et al, 2017 | LOT-R score:<br>Cat 1 $\leq 15$ (reference)<br>Cat 2 16-18<br>Cat 3 $> 18$                                                   | Israeli Population Registry, medical records, death                                                              | No  | Age, sex, education, employment status, and partner status, Charlson comorbidity index, Killip class, hypertension, diabetes mellitus, dyslipidemia, depression, social support, smoking and obesity                                                                                                                                                                                                                           |

|  |  |                                                                                               |  |  |
|--|--|-----------------------------------------------------------------------------------------------|--|--|
|  |  | certificates,<br>family<br>physicians, and<br>family<br>members<br>for all-cause<br>mortality |  |  |
|--|--|-----------------------------------------------------------------------------------------------|--|--|

Cat = category; NR = not reported.

**eTable 2.** Quality of Included Studies per Newcastle-Ottawa Scale for Quality Assessment of Cohort Studies

| Study               | Selection                                |                                     |                           | Comparability on basis of design and analysis | Outcome                  |                    | Adequacy of follow-up of cohorts |
|---------------------|------------------------------------------|-------------------------------------|---------------------------|-----------------------------------------------|--------------------------|--------------------|----------------------------------|
|                     | Representativeness of the exposed cohort | Selection of the non-exposed cohort | Ascertainment of exposure |                                               | Ascertainment of outcome | Adequate follow-up |                                  |
| Anthony, 2016       | **                                       | **                                  | *                         | **                                            | **                       | **                 | **                               |
| Boehm, 2011         | **                                       | **                                  | *                         | **                                            | **                       | *                  | **                               |
| Brummett, 2006      | **                                       | **                                  | **                        | *                                             | **                       | **                 | **                               |
| Engberg, 2014       | **                                       | **                                  | *                         | **                                            | **                       | **                 | **                               |
| Giltay, 2004        | **                                       | **                                  | *                         | **                                            | **                       | **                 | **                               |
| Giltay, 2006        | **                                       | **                                  | *                         | **                                            | **                       | **                 | **                               |
| Grossardt, 2009     | **                                       | **                                  | *                         | *                                             | **                       | **                 | **                               |
| Hansen, 2010        | **                                       | **                                  | *                         | **                                            | **                       | **                 | **                               |
| Kim, 2011           | **                                       | **                                  | **                        | **                                            | *                        | *                  | **                               |
| Kim, 2016           | **                                       | **                                  | **                        | **                                            | **                       | **                 | **                               |
| Kubzansky, 2001     | **                                       | **                                  | **                        | **                                            | **                       | **                 | **                               |
| Mosing, 2012        | **                                       | **                                  | **                        | **                                            | **                       | **                 | **                               |
| Nabi, 2010          | **                                       | **                                  | **                        | **                                            | **                       | **                 | **                               |
| Tindle, 2009        | **                                       | **                                  | **                        | **                                            | **                       | **                 | **                               |
| Weiss-Faratci, 2017 | **                                       | **                                  | **                        | **                                            | **                       | **                 | **                               |

Asterisks are the star ratings per the Newcastle-Ottawa Scale; \* and \*\* indicates the highest ratings for these categories.

**eFigure.** Funnel Plots to Assess Publication Bias for (A) Cardiovascular Events and (B) All-cause Mortality

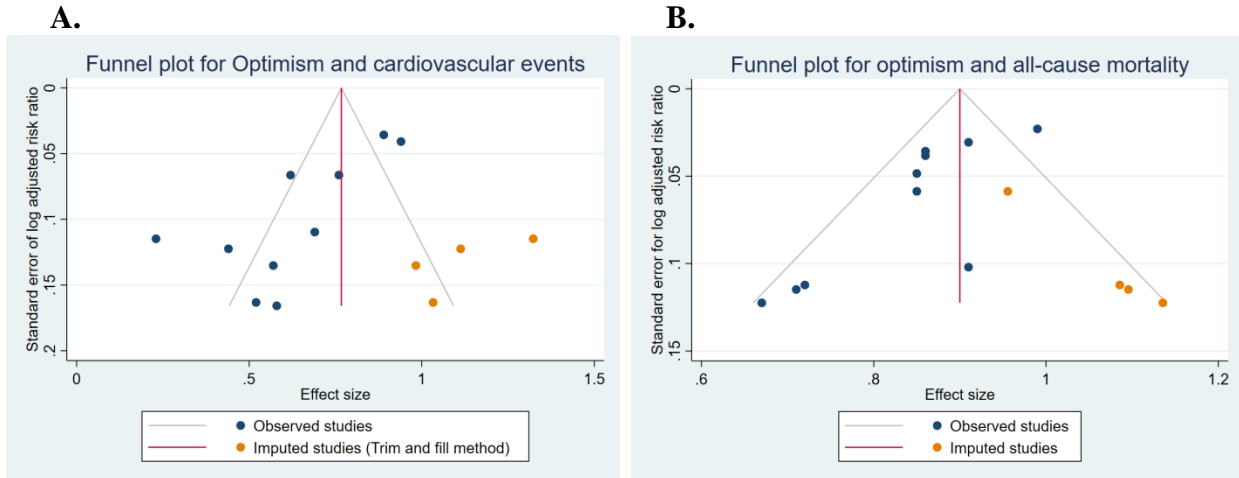

Supplement: jamanetwopen-2-e1912200-s001.pdf [file jamanetwopen-2-e1912200-s001.pdf]
